# Supplementary material for: Diversifying Selection Between Pure-Breed and Free-Breeding Dogs Inferred from Genome-Wide SNP Analysis
Source: PubMed Central journal article supplement (PMC4978884; doi:10.1534/g3.116.029678), 2016-05-27
Supplement: supp_g3.116.029678_TableS3.pdf [file supp_g3.116.029678_TableS3.pdf]

**Table S3.** Outlier SNPs inferred in BAYESCAN analysis comparing: **(A)** East Asian dog breeds vs FBDs. All these SNPs were also identified as outliers in the comparison either between modern European dog breeds and FBDs (MB vs FBD) or between East Asian dog breeds and modern European dog breeds (EA vs MB). **(B)** Modern European dog breeds vs FBDs. For (B), 60 outlier SNPs were identified, but only 20 SNPs with lowest q-values (<0.005) are listed here. This includes all the loci that were also identified as outliers in the comparison between East Asian dog breeds and FBDs. **(C)** East Asian vs modern European breeds (EA vs MB).

The BAYESCAN outputs reported here concern comparisons with all Eurasian FBDs. Genes identified as outliers in comparisons of European FBDs vs European breeds and East Asian FBDs vs East Asian breeds are marked with an asterisk.

**A**

| SNP ID                   | chr | SNP position CanFam2 | SNP position CanFam3.1 | Location relative to closest gene | Gene symbol | Gene position (CanFam3.1) | Ensembl gene ID   | Baye Scan q-value | Baye Scan alpha | F <sub>ST</sub> | Outlier in other comparisons | Gene function                                                                                                                                                                                             |
|--------------------------|-----|----------------------|------------------------|-----------------------------------|-------------|---------------------------|-------------------|-------------------|-----------------|-----------------|------------------------------|-----------------------------------------------------------------------------------------------------------------------------------------------------------------------------------------------------------|
| BICF2G630842219*         | 16  | 3,195,982            | 193,966                | exon                              | PKD1L1      | 123,726-199,953           | ENSCAFG0000014734 | 0.082             | 1.584           | 0.238           | MB vs FBD                    | calcium regulation in primary cilia; associated with polycystic kidney disease in humans; plays a role in the male reproductive system                                                                    |
| BICF2S23454833*          | 16  | 3,212,612            | 210,603                | 10,650 3'-downstream              | PKD1L1      | 123,726-199,953           | ENSCAFG0000014734 | 0.061             | 1.576           | 0.237           | MB vs FBD                    | calcium regulation in primary cilia; associated with polycystic kidney disease in humans; plays a role in the male reproductive system                                                                    |
| BICF2G630842234*         | 16  | 3,198,732            | 196,716                | intron                            | PKD1L1      | 123,726-199,953           | ENSCAFG0000014734 | 0.106             | 1.543           | 0.234           | MB vs FBD                    | calcium regulation in primary cilia; associated with polycystic kidney disease in humans; plays a role in the male reproductive system                                                                    |
| TIGRP2P367127_rs8543245* | 29  | 36,729,715           | 33,726,769             | -191,715 5'-upstream              | MMP16       | 33,918,484-34,207,979     | ENSCAFG0000008925 | 0.073             | 1.596           | 0.239           | MB vs FBD                    | encodes matrix metalloproteinase, involved in embryonic development, reproduction, and tissue remodelling                                                                                                 |
| TIGRP2P369635_rs8651736* | 36  | 8,528,500            | 5,525,355              | intron                            | MARCH7      | 5,499,129-5,531,823       | ENSCAFG0000009464 | 0.089             | 1.583           | 0.238           | MB vs FBD                    | member of MARCH family of membrane-bound E3 ubiquitin ligases involved in regulation of diverse cellular processes; plays a role in the immune system (MHC chains retro-translocation) and spermiogenesis |

|                                 |    |            |                                       |                                  |                                        |                                                         |                                                  |       |       |       |           |                                                                                                                                                              |
|---------------------------------|----|------------|---------------------------------------|----------------------------------|----------------------------------------|---------------------------------------------------------|--------------------------------------------------|-------|-------|-------|-----------|--------------------------------------------------------------------------------------------------------------------------------------------------------------|
| BICF2S23653049*                 | 21 | 40,866,371 | 37,658,358<br>37,676,665 <sup>1</sup> | exon 1                           | CALCB<br>(CRSP1)<br>CRSP3 <sup>1</sup> | 37,658,340-<br>37,661,354;<br>37,676,841-<br>37,680,643 | ENSCAFG0<br>0000008546<br>ENSCAFG0<br>0000004868 | 0.096 | 1.588 | 0.238 | MB vs FBD | belong to CALCA gene family that encodes peptides and receptors involved in calcium regulation                                                               |
| BICF2P1363919*                  | 31 | 42,251,731 | 39,884,152                            | -652<br>3'-<br>downstr<br>eam    | V1R<br>homo-<br>logue                  | 39,882,640-<br>39,883,500                               | not<br>annotated in<br>dog                       | 0.101 | 1.556 | 0.235 | MB vs FBD | homologue of vomeronasal 1 receptor gene in several mammalian species                                                                                        |
| TIGRP2P97765_rs8<br>917688*     | 7  | 49,723,506 | 46,745,071                            | 365,573<br>3-<br>downstr<br>eam  | SETBP1                                 | 45,951,185-<br>46,379,498                               | ENSCAFG0<br>0000017676                           | 0.139 | 1.250 | 0.204 | MB vs FBD | associated with Schinzel-Giedion midface retraction syndrome in humans                                                                                       |
| BICF2G630509420;<br>rs23187455* | 24 | 14,905,265 | 11,907,423                            | intron                           | MKKS                                   | 11,900,097-<br>11,913,740                               | ENSCAFG0<br>0000005651                           | 0.016 | 1.841 | 0.265 | EA vs MB  | associated with McKusick-Kaufman syndrome and Bardet-Biedl syndrome type 6 in humans; among secondary symptoms are genital abnormalities and dental crowding |
| BICF2G630662694*                | 13 | 35,179,641 | 32,140,606                            | 257,806<br>3'-<br>downstr<br>eam | GAPDHS<br>homo-<br>logue               | 31,881,600-<br>31,882,800                               | not<br>annotated in<br>dog                       | 0.022 | 1.801 | 0.260 | EA vs MB  | glyceraldehyde-3-phosphate dehydrogenase, spermatogenic; specifically expressed in spermatogenous cells                                                      |
| BICF2G630560144;<br>rs24457899* | 7  | 58,926,419 | 55,945,622                            | intron                           | NOL4                                   | 55,618,488-<br>56,009,178                               | ENSCAFG0<br>0000017974                           | 0.040 | 1.456 | 0.222 | EA vs MB  | encodes nucleolar protein 4 expressed in fetal brain, adult brain, and testis                                                                                |
| BICF2P1348247;<br>rs8579426     | 18 | 17,773,402 | 14,783,296                            | intron                           | ATXN7L1                                | 14,764,456-<br>14,816,374                               | ENSCAFG0<br>0000004012                           | 0.124 | 1.274 | 0.204 | EA vs MB  | associated with spinocerebellar ataxia type 7 in humans                                                                                                      |

\* SNPs that were also identified as outliers in the comparisons between (A) East Asian dog breeds and East Asian FBDs only, (B) modern European breeds and European FBDs only.

<sup>1</sup>Additional mapping

**B**

| SNP ID                       | chr | position<br>CanFam2 | position<br>CanFam3.1    | Location<br>relative<br>to<br>closest<br>gene | Gene<br>symbol            | Gene position<br>(CanFam3.1)                            | Ensembl<br>version         | Baye<br>Scan<br>q-<br>value | Baye<br>Scan<br>alpha | F <sub>ST</sub> | Outlier in<br>other<br>compa-<br>risons | Gene function                                                                                                                                                                                             |
|------------------------------|-----|---------------------|--------------------------|-----------------------------------------------|---------------------------|---------------------------------------------------------|----------------------------|-----------------------------|-----------------------|-----------------|-----------------------------------------|-----------------------------------------------------------------------------------------------------------------------------------------------------------------------------------------------------------|
| TIGRP2P369635_rs<br>8651736* | 36  | 8,528,500           | 5,525,355                | intron                                        | MARCH7                    | 5,499,129-<br>5,531,823                                 | ENSCAFG0<br>0000009464     | 0.000                       | 2.766                 | 0.246           | EA vs FBD                               | member of MARCH family of membrane-bound E3 ubiquitin ligases involved in regulation of diverse cellular processes; plays a role in the immune system (MHC chains retro-translocation) and spermiogenesis |
| BICF2P1363919*               | 31  | 42,251,731          | 39,884,152               | 652<br>3'-<br>downstr<br>eam                  | V1R<br>homo-<br>logue     | 39,882,640-<br>39,883,500                               | not<br>annotated in<br>dog | 0.000                       | 2.350                 | 0.180           | EA vs FBD                               | homologue of vomeronasal 1 receptor gene in several mammalian species                                                                                                                                     |
| BICF2S23454833*              | 16  | 3,212,612           | 210,603                  | 10,650<br>3'-<br>downstr<br>eam               | PKD1L1                    | 123,726-<br>199,953                                     | ENSCAFG0<br>0000014734     | 0.001                       | 1.607                 | 0.099           | EA vs FBD                               | calcium regulation in primary cilia; associated with polycystic kidney disease in humans; plays a role in the male reproductive system                                                                    |
| BICF2G630842219*             | 16  | 3,195,982           | 193,966                  | exon                                          | PKD1L1                    | 123,726-<br>199,953                                     | ENSCAFG0<br>0000014734     | 0.002                       | 1.607                 | 0.098           | EA vs FBD                               | calcium regulation in primary cilia; associated with polycystic kidney disease in humans; plays a role in the male reproductive system                                                                    |
| BICF2G630842234*             | 16  | 3,198,732           | 196,716                  | intron                                        | PKD1L1                    | 123,726-<br>199,953                                     | ENSCAFG0<br>0000014734     | 0.003                       | 1.632                 | 0.102           | EA vs FBD                               | calcium regulation in primary cilia; associated with polycystic kidney disease in humans; plays a role in the male reproductive system                                                                    |
| TIGRP2P367127_rs<br>8543245* | 29  | 36,729,715          | 33,726,769               | -191,715<br>5'-<br>upstrea<br>m               | MMP16                     | 33,918,484-<br>34,207,979                               | ENSCAFG0<br>0000008925     | 0.003                       | 1.610                 | 0.100           | EA vs FBD                               | encodes matrix metalloproteinase, involved in embryonic development, reproduction, and tissue remodelling                                                                                                 |
| BICF2S23653049*              | 21  | 40,866,371          | 37,658,358<br>37,676,665 | exon 1                                        | CALCB<br>(CRSP1)<br>CRSP3 | 37,658,340-<br>37,661,354;<br>37,676,841-<br>37,680,643 | ENSCAFG0<br>0000008562     | 0.004                       | 1.617                 | 0.100           | EA vs FBD                               | belong to CALCA gene family that encodes peptides and receptors involved in calcium regulation                                                                                                            |
| TIGRP2P97765_rs8<br>917688*  | 7   | 49,723,506          | 46,745,071               | 365,573<br>3'-<br>downstr<br>eam              | SETBP1                    | 45,951,185-<br>46,379,498                               | ENSCAFG0<br>0000017676     | 0.004                       | 1.593                 | 0.098           | EA vs FBD                               | associated with Schinzel-Giedion midface retraction syndrome in humans                                                                                                                                    |

|                                    |    |            |            |                                      |                                                 |                           |                            |       |       |       |    |                                                                                                                                                                                    |
|------------------------------------|----|------------|------------|--------------------------------------|-------------------------------------------------|---------------------------|----------------------------|-------|-------|-------|----|------------------------------------------------------------------------------------------------------------------------------------------------------------------------------------|
| BICF2P1103910*                     | 3  | 63,448,348 | 60,627,895 | -18,237<br>5'-<br>upstream           | ADRA2C                                          | 60,646,132-<br>60,647,722 | ENSCAFG0<br>0000014602     | 0.000 | 1.880 | 0.126 | no | adrenergic receptor; involved in regulation of sympathetic nervous system                                                                                                          |
| BICF2S23056947*                    | 11 | 62,401,369 | 59,372,782 | 126,320<br>3'-<br>downstream         | CYLC2                                           | 59,233,061-<br>59,246,462 | ENSCAFG0<br>0000002624     | 0.000 | 2.054 | 0.142 | no | specifically expressed in testis; the encoded protein is part of the cytoskeletal calyx of mammalian sperm heads                                                                   |
| TIGRP2P326458_rs<br>9245895*       | 25 | 22,667,865 | 19,685,756 | 122,854<br>3'-<br>downstream<br>gene | DNMT3A                                          | 19,492,193-<br>19,562,902 | ENSCAFG0<br>0000004159     | 0.000 | 2.038 | 0.140 | no | encodes DNA methyltransferase, an enzyme that catalyses DNA methylation                                                                                                            |
| TIGRP2P197019_rs<br>8772369*       | 15 | 20,378,570 | 17,371,288 | gene                                 | OR1B1<br>(human)<br>homolog                     | -                         | not<br>annotated in<br>dog | 0.000 | 1.901 | 0.126 | no | olfactory receptor gene annotated in human, mouse, rat and Xenopus                                                                                                                 |
| BICF2P40264*                       | 31 | 36,570,440 | no mapping | gene                                 | SH3BGR<br>homolog                               | -                         | not<br>annotated in<br>dog | 0.000 | 1.921 | 0.128 | no | encodes a glutamate-rich protein expressed in skeletal muscles and heart                                                                                                           |
| BICF2S22912847                     | 10 | 12,275,358 | 9,289,666  | 23,049<br>3'-<br>downstream          | HNRNPA1<br>homolog<br>uncharacterised in<br>dog | 9,265,652-<br>9,266,617   | ENSCAFG0<br>0000000389     | 0.001 | 1.701 | 0.107 | no | encodes heterogeneous nuclear ribonucleoprotein, involved in mRNA metabolism and transport                                                                                         |
| BICF2S2298493*                     | 19 | 32,659,291 | 29,638,300 | -129,385<br>5'-<br>upstream          | INHBB                                           | 29,767,685-<br>29,768,479 | ENSCAFG0<br>0000004840     | 0.001 | 1.772 | 0.115 | no | encoded a glycoprotein that is pituitary FSH secretion inhibitor; may also regulate testosterone production                                                                        |
| BICF2P886804;<br><u>rs8850580*</u> | 24 | 24,579,647 | 21,610,316 | intron                               | POFUT1                                          | 21,608,905-<br>21,636,579 | ENSCAFG0<br>0000007186     | 0.001 | 1.700 | 0.107 | no | a core component of Notch signalling; the encoded protein participates in melanin synthesis and transport; associated with reticulate pigment disorders and oral cancers in humans |
| BICF2P262082*                      | 19 | 8,406,795  | 5,405,052  | -437,119<br>5'-<br>upstream          | PCDH18                                          | 4,967,933-<br>4,983,273   | ENSCAFG0<br>0000003758     | 0.001 | 1.713 | 0.108 | no | encodes a cadherin-related neuronal receptor, which may play a role in cell-cell connections in the brain                                                                          |
| BICF2P433473*                      | 19 | 8,367,547  | 5,365,804  | -397,871<br>5'-<br>upstream          | PCDH18                                          | 4,967,933-<br>4,983,273   | ENSCAFG0<br>0000003758     | 0.002 | 1.625 | 0.100 | no | encodes a cadherin-related neuronal receptor, which may play a role in cell-cell connections in the brain                                                                          |
| BICF2S23651627                     | 10 | 11,616,330 | 8,629,969  | -353 5'-<br>upstream                 | LLPH                                            | 8,630,322-<br>8,638,520   | ENSCAFG0<br>0000030531     | 0.001 | 1.671 | 0.104 | no | encoded protein plays a role in long-term synaptic facilitation in <i>Aplysia</i>                                                                                                  |

|               |   |            |            |                            |      |                           |                        |       |       |       |    |                                                                                                                                                                              |
|---------------|---|------------|------------|----------------------------|------|---------------------------|------------------------|-------|-------|-------|----|------------------------------------------------------------------------------------------------------------------------------------------------------------------------------|
| BICF2P1396496 | 1 | 27,353,247 | 24,322,562 | -65,718<br>5'-<br>upstream | MC2R | 24,388,280-<br>24,389,164 | ENSCAFG0<br>0000000170 | 0.005 | 1.594 | 0.099 | no | encoded protein is melanocortin 2 receptor (adrenocorticotrophic hormone); associated with familial glucocorticoid deficiency, involving hyperpigmentation and hypoglycaemia |
|---------------|---|------------|------------|----------------------------|------|---------------------------|------------------------|-------|-------|-------|----|------------------------------------------------------------------------------------------------------------------------------------------------------------------------------|

---

\* SNPs that were also identified as outliers in the comparisons between (A) East Asian dog breeds and East Asian FBDs only, (B) modern European breeds and European FBDs only.

## C

| SNP ID                         | chr | position<br>CanFam2 | position<br>CanFam3.1 | Location<br>relative<br>to<br>closest<br>gene | Gene<br>symbol           | Gene position<br>(CanFam3.1) | Ensembl<br>version         | Baye<br>Scan<br>q-<br>value | Baye<br>Scan<br>alpha | F <sub>ST</sub> | Outlier in<br>other<br>comparisons | Gene function                                                                                                                                                                        |
|--------------------------------|-----|---------------------|-----------------------|-----------------------------------------------|--------------------------|------------------------------|----------------------------|-----------------------------|-----------------------|-----------------|------------------------------------|--------------------------------------------------------------------------------------------------------------------------------------------------------------------------------------|
| BICF2P1348247;<br>rs8579426    | 18  | 17,773,402          | 14,783,296            | intron                                        | ATXN7L1                  | 14,764,456-<br>14,816,374    | ENSCAFG0<br>0000004012     | 0.059                       | 1.602                 | 0.317           | EA vs FBD                          | associated with spinocerebellar ataxia type 7 in humans                                                                                                                              |
| BICF2G630560144;<br>rs24457899 | 7   | 58,926,419          | 55,945,622            | intron                                        | NOL4                     | 55,618,488-<br>56,009,178    | ENSCAFG0<br>0000017974     | 0.076                       | 1.359                 | 0.279           | EA vs FBD                          | encodes nucleolar protein 4 expressed in fetal brain, adult brain, and testis                                                                                                        |
| BICF2G630662694                | 13  | 35,179,641          | 32,140,606            | 257,806<br>3'-<br>downstream<br>intron        | GAPDHS<br>homo-<br>logue | 31,881,600-<br>31,882,800    | not<br>annotated in<br>dog | 0.093                       | 1.451                 | 0.296           | EA vs FBD                          | glyceraldehyde-3-phosphate dehydrogenase, spermatogenic; specifically expressed in spermatogenic cells                                                                               |
| BICF2G630509420;<br>rs23187455 | 24  | 14,905,265          | 11,907,423            | intron                                        | MKKS                     | 11,900,097-<br>11,913,740    | ENSCAFG0<br>0000005651     | 0.145                       | 1.272                 | 0.272           | EA vs FBD                          | associated with McKusick-Kaufman syndrome and Bardet-Biedl syndrome type 6 in humans; among secondary symptoms are genital abnormalities and dental crowding                         |
| BICF2G630133149;<br>rs23978953 | 37  | 30,777,689          | 27,776,287            | intron                                        | EPHA4                    | 27,677,566-<br>27,809,643    | ENSCAFG0<br>0000015936     | 0.020                       | 1.596                 | 0.313           | MB vs FBD                          | one of ephrin receptors, the largest subfamily of receptor tyrosine kinases; their ephrin ligands are important mediators of cell-cell communication                                 |
| BICF2S2364842;<br>rs24136831   | 4   | 42,678,635          | 39,487,456            | intron                                        | ERGIC1                   | 39,436,405-<br>39,540,037    | ENSCAFG0<br>0000016813     | 0.049                       | 1.445                 | 0.291           | no                                 | encodes an endoplasmic reticulum-golgi intermediate compartment protein (a membrane protein)                                                                                         |
| BICF2P176847                   | 7   | 58,159,113          | 55,178,223            | exon 9                                        | DTNA                     | 55,068,136-<br>55,192,049    | ENSCAFG0<br>0000017951     | 0.111                       | 1.226                 | 0.261           | no                                 | part of the dystrophin-associated protein complex, which disruption may result in muscular dystrophy; the encoded protein may be involved in the formation and stability of synapses |
| BICF2G630460099;<br>rs23187455 | 34  | 28,007,452          | 24,997,821            | intron                                        | ATP13A4                  | 24,903,358-<br>25,015,885    | ENSCAFG0<br>0000014158     | 0.128                       | 1.323                 | 0.279           | no                                 | cation-transporting ATPase                                                                                                                                                           |
