# Supplementary material for: Diversifying Selection Between Pure-Breed and Free-Breeding Dogs Inferred from Genome-Wide SNP Analysis
Source: PubMed Central journal article supplement (PMC4978884; doi:10.1534/g3.116.029678), 2016-05-27
Supplement: supp_g3.116.029678_TableS4.pdf [file supp_g3.116.029678_TableS4.pdf]

**Table S4.** Outlier SNPs inferred in BAYESCAN analysis comparing modern European dog breeds and FBDs. This table lists 40 outlier loci with q-values between 0.006 and 0.086, while the top 20 candidate loci are listed in Supplementary Table 3B.

| ID             | chr | SNP position CanFam2 | SNP position CanFam3.1 | located within gene | gene symbol | q-value | alpha | Fst   | gene function                                                                                                                                                                                                                                                                                                             |
|----------------|-----|----------------------|------------------------|---------------------|-------------|---------|-------|-------|---------------------------------------------------------------------------------------------------------------------------------------------------------------------------------------------------------------------------------------------------------------------------------------------------------------------------|
| chr37_30777689 | 37  | 30777689             | 27776287               | yes                 | EPHA10      | 0.006   | 1.531 | 0.093 | ephrin receptors, the largest subfamily of receptor tyrosine kinases (RTKs), and their ephrin ligands are important mediators of cell-cell communication                                                                                                                                                                  |
| chr19_5955685  | 19  | 5955685              | 2954842                | yes                 | MAML3       | 0.007   | 1.532 | 0.093 | uncharacterised                                                                                                                                                                                                                                                                                                           |
| chr21_9711224  | 21  | 9711224              | 6712454                | yes                 | PANX1       | 0.008   | 1.554 | 0.096 | abundantly expressed in central nerve system                                                                                                                                                                                                                                                                              |
| chr5_81365059  | 5   | 81365059             | 78358196               | no                  | Zfx2        | 0.010   | 1.511 | 0.092 | zinc finger homeobox 2                                                                                                                                                                                                                                                                                                    |
| chr24_12907652 | 24  | 12907652             | 9911173                | no                  | SPTLC3      | 0.011   | 1.568 | 0.099 | catalyzes the rate-limiting step of the de novo synthesis of sphingolipids                                                                                                                                                                                                                                                |
| chr3_18128825  | 3   | 18128825             | 15247469               | yes                 | KIAA0825    | 0.013   | 1.482 | 0.091 | uncharacterised                                                                                                                                                                                                                                                                                                           |
| chr1_77193954  | 1   | 77193954             | 74138042               | no                  | AGTPBP1     | 0.014   | 1.508 | 0.093 | a zinc carboxypeptidase that contains nuclear localization signals and an ATP/GTP-binding motif that was initially cloned from regenerating spinal cord neurons of the mouse                                                                                                                                              |
| chr23_17892421 | 23  | 17892421             | 14850831               | yes                 | RBMS3       | 0.016   | 1.479 | 0.092 | encodes an RNA-binding protein that belongs to the c-myc gene single-strand binding protein family                                                                                                                                                                                                                        |
| chr38_25302145 | 38  | 25302145             | 22289219               | yes                 | KCNJ5       | 0.018   | 1.623 | 0.109 | the protein encoded by this gene is an integral membrane protein and inward-rectifier type potassium channel                                                                                                                                                                                                              |
| chr3_5176486   | 3   | 5176486              | 2291117                | no                  | MAN2A1      | 0.021   | 1.432 | 0.088 | encodes a glycosyl hydrolase that localizes to the Golgi and catalyzes the final hydrolytic step in the asparagine-linked oligosaccharide (N-glycan) maturation pathway. Mutations in the mouse homolog of this gene have been shown to cause a systemic autoimmune disease similar to human systemic lupus erythematosus |
| chr24_11949798 | 24  | 11949798             | 8953265                | no                  | ESF1        | 0.023   | 1.403 | 0.087 | nucleolar pre-rRNA processing protein, homolog                                                                                                                                                                                                                                                                            |
| chr14_62667661 | 14  | 62667661             | 59700205               | no                  | PTPRZ1      | 0.025   | 1.464 | 0.092 | protein tyrosine phosphatase, receptor-type, Z polypeptide 1                                                                                                                                                                                                                                                              |
| chr19_25112623 | 19  | 25112623             | 22095695               | no                  | TADA1       | 0.027   | 1.400 | 0.086 | a protein subunit of the human STAGA complex, which is a chromatin-modifying multiprotein complex                                                                                                                                                                                                                         |
| chr10_12082601 | 10  | 12082601             | 9096909                | yes                 | hnmpa1      | 0.029   | 1.388 | 0.085 | heterogeneous nuclear ribonucleoprotein                                                                                                                                                                                                                                                                                   |
| chr21_31768513 | 21  | 31768513             | not mapped             | yes                 | Olfir615    | 0.032   | 1.576 | 0.106 | olfactory receptor in mouse and other species                                                                                                                                                                                                                                                                             |
| chr12_31105288 | 12  | 31105288             | 28103140               | yes                 | EYS         | 0.034   | 1.388 | 0.086 | the gene is mutated in autosomal recessive retinitis pigmentosa                                                                                                                                                                                                                                                           |
| chr38_5810593  | 38  | 5810593              | 2810738                | yes                 | RASSF5      | 0.036   | 1.378 | 0.085 | belongs to a low density lipoprotein (LDL) receptor                                                                                                                                                                                                                                                                       |
| chr19_46546307 | 19  | 46546307             | 43529011               | yes                 | LRP1B       | 0.039   | 1.353 | 0.083 | gene family; these receptors play a wide variety of roles in normal cell function and development due to their interactions with multiple ligands                                                                                                                                                                         |

|                |    |          |          |     |              |       |       |       |                                                                                                                                                                                                                                                         |
|----------------|----|----------|----------|-----|--------------|-------|-------|-------|---------------------------------------------------------------------------------------------------------------------------------------------------------------------------------------------------------------------------------------------------------|
| chr3_41630484  | 3  | 41630484 | 38775858 | yes | FAM189A1     | 0.041 | 1.360 | 0.084 | uncharacterised                                                                                                                                                                                                                                         |
| chr3_91219743  | 3  | 91219743 | 88393513 | yes | KCNIP4       | 0.043 | 1.347 | 0.083 | members of the KCNIP family are small calcium binding proteins                                                                                                                                                                                          |
| chr3_18060114  | 3  | 18060114 | 15178635 | yes | KIAA0825     | 0.045 | 1.353 | 0.084 | uncharacterised                                                                                                                                                                                                                                         |
| chr9_28053901  | 9  | 28053901 | 24727059 | yes | LOC101927166 | 0.047 | 1.331 | 0.083 | uncharacterised                                                                                                                                                                                                                                         |
| chr24_24839693 | 24 | 24839693 | 21868482 | yes | NOL4L        | 0.049 | 1.314 | 0.081 | nucleolar protein 4-like                                                                                                                                                                                                                                |
| chr14_62650343 | 14 | 62650343 | 59682887 | no  | PTPRZ1       | 0.052 | 1.341 | 0.084 | protein tyrosine phosphatase, receptor-type, Z polypeptide 1                                                                                                                                                                                            |
| chr17_20035261 | 17 | 20035261 | 17053132 | no  | MDM2         | 0.054 | 1.381 | 0.089 | E3 ubiquitin protein ligase                                                                                                                                                                                                                             |
| chr1_77241018  | 1  | 77241018 | 74185106 | no  | AGTPBP1      | 0.056 | 1.329 | 0.083 | a zinc carboxypeptidase that contains nuclear localization signals and an ATP/GTP-binding motif that was initially cloned from regenerating spinal cord neurons of the mouse                                                                            |
| chr3_47778623  | 3  | 47778623 | 44917547 | no  | LINC00924    | 0.058 | 1.309 | 0.081 | long intergenic non-protein coding RNA<br>the encoded protein may play a role in tissue development though interactions with members of the transforming growth factor beta family, such as bone morphogenetic proteins                                 |
| chr17_31417745 | 17 | 31417745 | 28316620 | no  | CRIM1        | 0.060 | 1.332 | 0.085 | encodes a cytoplasmic protein that contains epidermal growth factor (EGF)-like repeats. The encoded heterotrimeric protein may be involved in cell growth regulation and differentiation. A similar protein in rodents is involved in craniosynostosis. |
| chr21_45874072 | 21 | 45874072 | 42683521 | yes | NELL1        | 0.062 | 1.297 | 0.081 | binds retinoic acid, the biologically active form of vitamin A which mediates cellular signalling in embryonic morphogenesis, cell growth and differentiation                                                                                           |
| chr23_21303651 | 23 | 21303651 | 18259671 | yes | RARB         | 0.064 | 1.465 | 0.100 | growth and differentiation                                                                                                                                                                                                                              |
| chr1_97087959  | 1  | 97087959 | 94022202 | no  | ERMP1        | 0.066 | 1.281 | 0.080 | endoplasmic reticulum metalloproteinase 1                                                                                                                                                                                                               |
| chr5_10056554  | 5  | 10056554 | 7055056  | no  | KIRREL3      | 0.068 | 1.279 | 0.081 | encodes a brain-expressed protein                                                                                                                                                                                                                       |
| chr23_5582872  | 23 | 5582872  | 2576920  | yes | g3pt         | 0.070 | 1.437 | 0.097 | glyceraldehyde 3-phosphate dehydrogenase testis-specific                                                                                                                                                                                                |
| chr19_10239039 | 19 | 10239039 | 7238947  | no  | DPPA4        | 0.072 | 1.428 | 0.097 | developmental pluripotency associated 4                                                                                                                                                                                                                 |
| chr4_9881858   | 4  | 9881858  | 6881449  | no  | MAP10        | 0.075 | 1.244 | 0.078 | microtubule-associated protein 10                                                                                                                                                                                                                       |
| chr21_34215267 | 21 | 34215267 | 31025920 | yes | Olf107       | 0.077 | 1.239 | 0.078 | olfactory receptor in mouse                                                                                                                                                                                                                             |
| chr19_3909399  | 19 | 3909399  | 908608   | yes | INPP4B       | 0.079 | 1.378 | 0.094 | inositol polyphosphate-4-phosphatase, type II                                                                                                                                                                                                           |
| chr32_33132224 | 32 | 33132224 | 30211752 | no  | ELOVL6       | 0.081 | 1.218 | 0.078 | fatty acid elongase                                                                                                                                                                                                                                     |
| chr5_10011493  | 5  | 10011493 | 7009995  | no  | KIRREL3      | 0.084 | 1.203 | 0.076 | encodes a brain-expressed protein<br>the protein encoded by this gene belongs to the G-protein-coupled receptor family. It is a receptor for the CC chemokine                                                                                           |
| chr23_6838955  | 23 | 6838955  | 3827959  | no  | CCR4         | 0.086 | 1.237 | 0.080 |                                                                                                                                                                                                                                                         |
