# Supplementary material for: Diversifying Selection Between Pure-Breed and Free-Breeding Dogs Inferred from Genome-Wide SNP Analysis
Source: PubMed Central journal article supplement (PMC4978884; doi:10.1534/g3.116.029678), 2016-05-27
Supplement: supp_g3.116.029678_TableS5.pdf [file supp_g3.116.029678_TableS5.pdf]

Table S5: Gene Ontology terms for candidate genes under diversifying selection between pure-breed dogs and FBDs. The genes were identified based on proximity to outlier SNPs identified in a BAYESCAN analysis for: (A) East Asian (EA) breeds vs FBDs. (B) Modern European (ME) breeds vs FBDs. For (B), 60 outlier loci were identified, but only 20 loci with lowest q-values (<0.005) are listed here. (C) East Asian vs European breeds.

Terms related to reproduction, behaviour, nervous system, digestion and metabolism, and development, are marked in bold.

**A**

| SNP ID                  | chr | located within gene | Gene symbol | Outlier in other comparisons | GO categories                              | GO terms                                                                                                                                                                                                                                                                                                                                                                                                                                                                                                                                                                                                                                                                                                                                                                                                                                                                                                                                                                                                                                                                                                                                                                                                                                                                                                                                                                                                                                                                                          |
|-------------------------|-----|---------------------|-------------|------------------------------|--------------------------------------------|---------------------------------------------------------------------------------------------------------------------------------------------------------------------------------------------------------------------------------------------------------------------------------------------------------------------------------------------------------------------------------------------------------------------------------------------------------------------------------------------------------------------------------------------------------------------------------------------------------------------------------------------------------------------------------------------------------------------------------------------------------------------------------------------------------------------------------------------------------------------------------------------------------------------------------------------------------------------------------------------------------------------------------------------------------------------------------------------------------------------------------------------------------------------------------------------------------------------------------------------------------------------------------------------------------------------------------------------------------------------------------------------------------------------------------------------------------------------------------------------------|
| BICF2G630842219         | 16  | yes; exon           | PKD1L1      | MB vs FBD                    | Biological Processes<br>Cellular Component | cell-cell adhesion<br>integral component of membrane                                                                                                                                                                                                                                                                                                                                                                                                                                                                                                                                                                                                                                                                                                                                                                                                                                                                                                                                                                                                                                                                                                                                                                                                                                                                                                                                                                                                                                              |
| BICF2S23454833          | 16  | no                  | PKD1L1      | MB vs FBD                    | Biological Processes<br>Cellular Component | cell-cell adhesion<br>integral component of membrane                                                                                                                                                                                                                                                                                                                                                                                                                                                                                                                                                                                                                                                                                                                                                                                                                                                                                                                                                                                                                                                                                                                                                                                                                                                                                                                                                                                                                                              |
| BICF2G630842234         | 16  | yes; intron         | PKD1L1      | MB vs FBD                    | Biological Processes<br>Cellular Component | cell-cell adhesion<br>integral component of membrane                                                                                                                                                                                                                                                                                                                                                                                                                                                                                                                                                                                                                                                                                                                                                                                                                                                                                                                                                                                                                                                                                                                                                                                                                                                                                                                                                                                                                                              |
| TIGRP2P367127_rs8543245 | 29  | no                  | MMP16       | MB vs FBD                    | Biological Processes                       | <b>collagen catabolic process; multicellular organismal protein metabolic process; multicellular organismal protein catabolic process; protein digestion</b><br>integral component of plasma membrane; extracellular region part                                                                                                                                                                                                                                                                                                                                                                                                                                                                                                                                                                                                                                                                                                                                                                                                                                                                                                                                                                                                                                                                                                                                                                                                                                                                  |
| TIGRP2P369635_rs8651736 | 36  | yes; intron         | MARCH7      | MB vs FBD                    | Cellular Component<br>Biological Processes | ubiquitin cycle                                                                                                                                                                                                                                                                                                                                                                                                                                                                                                                                                                                                                                                                                                                                                                                                                                                                                                                                                                                                                                                                                                                                                                                                                                                                                                                                                                                                                                                                                   |
| BICF2S23653049          | 21  | yes; exon           | CALCB       | MB vs FBD                    | Molecular Function<br>Biological Processes | protein binding; zinc ion binding; ligase activity<br><b>regulation of neurological system process; neuropeptide signaling pathway; behaviour; feeding behaviour; multicellular organismal development; organ development; anatomical structure morphogenesis; skeletal system development; regulation of ossification; biomineral tissue development; positive regulation of bone remodeling;</b> vasodilation of artery involved in baroreceptor response to increased systemic arterial blood pressure; regulation of smooth muscle contraction; regulation of heart rate; regulation of systemic arterial blood pressure by baroreceptor feedback; baroreceptor response to increased vasodilation of artery; baroreceptor response to increased systemic arterial blood pressure; vascular process in circulatory system; tube morphogenesis; inflammatory response; cAMP-mediated signaling; positive regulation of hydrolase activity; positive regulation of lyase activity; positive regulation of adenylate cyclase activity; activation of phospholipase C activity; regulation of blood vessel size; vasodilation; positive regulation of cytosolic calcium ion concentration; homeostatic process; cell-cell signaling; response to external stimulus; response to heat; detection of temperature stimulus involved in sensory perception of pain; response to pain; multicellular organismal response to stress; regulation of biological quality; regulation of biological process |
|                         |     |                     |             |                              | Molecular Function                         | <b>dopamine neurotransmitter receptor activity; hormone activity;</b> calcitonin receptor                                                                                                                                                                                                                                                                                                                                                                                                                                                                                                                                                                                                                                                                                                                                                                                                                                                                                                                                                                                                                                                                                                                                                                                                                                                                                                                                                                                                         |

|                                |    |                |                          |           |                                                                  |                                                                                                                                                                                                                                                                                                                                                                                                                                                                                                                                                                                                                                                                                                                                                                                                                                                                                                                                                                                                                                               |
|--------------------------------|----|----------------|--------------------------|-----------|------------------------------------------------------------------|-----------------------------------------------------------------------------------------------------------------------------------------------------------------------------------------------------------------------------------------------------------------------------------------------------------------------------------------------------------------------------------------------------------------------------------------------------------------------------------------------------------------------------------------------------------------------------------------------------------------------------------------------------------------------------------------------------------------------------------------------------------------------------------------------------------------------------------------------------------------------------------------------------------------------------------------------------------------------------------------------------------------------------------------------|
| BICF2P1363919                  | 31 | no             | V1R<br>homo-<br>logue    | MB vs FBD | Cellular Component<br>Biological Processes<br>Molecular Function | binding; G-protein coupled receptor signaling pathway; negative regulation of transcription<br><b>axon part; neuronal cell body; neuron projection; terminal bouton;</b> endoplasmic reticulum; extracellular space; nucleus; cell projection; soluble fraction<br><b>response to pheromone pheromone receptor activity;</b> transmembrane receptor activity; rhodopsin-like receptor activity; G-protein coupled receptor signaling pathway; cell surface receptor linked signal transduction                                                                                                                                                                                                                                                                                                                                                                                                                                                                                                                                                |
| TIGRP2P97765_rs8<br>917688     | 7  | no             | SETBP1                   | MB vs FBD | Cellular Component<br>Molecular Function                         | integral to membrane; plasma membrane; cell part<br>DNA binding; protein binding                                                                                                                                                                                                                                                                                                                                                                                                                                                                                                                                                                                                                                                                                                                                                                                                                                                                                                                                                              |
| BICF2G630509420;<br>rs23187455 | 24 | yes;<br>intron | MKKS                     | EA vs MB  | Cellular Component<br>Biological Processes                       | cell part; nucleus<br><b>behaviour; multi-organism behavior; social behavior; development of primary sexual characteristics; developmental process involved in reproduction; sex differentiation; reproductive structure development; gonad development; spermatid development; spermatid differentiation; anatomical structure morphogenesis; organ development;</b> heart development; nonmotile primary cilium assembly; flagellum assembly; flagellum organization; cell projection assembly; detection of abiotic stimulus; detection of mechanical stimulus involved in sensory perception of sound; photoreceptor cell maintenance; response to mechanical stimulus; response to abiotic stimulus; homeostatic process; cellular homeostasis; regulation of biological quality<br><b>dopamine neurotransmitter receptor activity sperm motility; negative regulation of flagellar cell motility; positive regulation of carbohydrate metabolic process; regulation of catabolic process; positive regulation of glycolytic process</b> |
| BICF2G630662694                | 13 | no             | GAPDHS<br>homo-<br>logue | EA vs MB  | Molecular Function<br>Biological Processes<br>Molecular Function | glyceraldehyde-3-phosphate dehydrogenase (NAD+) (phosphorylating) activity; oxidoreductase activity; NAD binding                                                                                                                                                                                                                                                                                                                                                                                                                                                                                                                                                                                                                                                                                                                                                                                                                                                                                                                              |
| BICF2G630560144;<br>rs24457899 | 7  | yes;<br>intron | NOL4                     | EA vs MB  | Cellular Component<br>Molecular Function                         | cell projection; flagellum<br>RNA binding                                                                                                                                                                                                                                                                                                                                                                                                                                                                                                                                                                                                                                                                                                                                                                                                                                                                                                                                                                                                     |
| BICF2P1348247;<br>rs8579426    | 18 | yes;<br>intron | ATXN7L1                  | EA vs MB  | Cellular Component<br>-                                          | nucleus; nucleolus<br>-                                                                                                                                                                                                                                                                                                                                                                                                                                                                                                                                                                                                                                                                                                                                                                                                                                                                                                                                                                                                                       |

---

**B**

| SNP ID                   | chr | located within gene | Gene symbol   | Outlier in other comparisons | GO categories                              | GO terms                                                                                                                                                                                                                                                                                                                                                                                                                                                                                                                                                                                                                                                                                                                                                                                                                                                                                                                                                                                                                                                                                                                                                                                                                                                                                                                                                                                                                                                                                                                                                                                         |
|--------------------------|-----|---------------------|---------------|------------------------------|--------------------------------------------|--------------------------------------------------------------------------------------------------------------------------------------------------------------------------------------------------------------------------------------------------------------------------------------------------------------------------------------------------------------------------------------------------------------------------------------------------------------------------------------------------------------------------------------------------------------------------------------------------------------------------------------------------------------------------------------------------------------------------------------------------------------------------------------------------------------------------------------------------------------------------------------------------------------------------------------------------------------------------------------------------------------------------------------------------------------------------------------------------------------------------------------------------------------------------------------------------------------------------------------------------------------------------------------------------------------------------------------------------------------------------------------------------------------------------------------------------------------------------------------------------------------------------------------------------------------------------------------------------|
| TIGRP2P369635_rs 8651736 | 36  | yes; intron         | MARCH7        | EA vs FBD                    | Biological Processes<br>Molecular Function | ubiquitin cycle<br>protein binding; zinc ion binding; ligase activity                                                                                                                                                                                                                                                                                                                                                                                                                                                                                                                                                                                                                                                                                                                                                                                                                                                                                                                                                                                                                                                                                                                                                                                                                                                                                                                                                                                                                                                                                                                            |
| BICF2P1363919            | 31  | no                  | V1R homologue | EA vs FBD                    | Biological Processes<br>Molecular Function | <b>response to pheromone</b><br><b>pheromone receptor activity</b> ; transmembrane receptor activity; rhodopsin-like receptor activity; G-protein coupled receptor signaling pathway; cell surface receptor linked signal transduction                                                                                                                                                                                                                                                                                                                                                                                                                                                                                                                                                                                                                                                                                                                                                                                                                                                                                                                                                                                                                                                                                                                                                                                                                                                                                                                                                           |
| BICF2S23454833           | 16  | no                  | PKD1L1        | EA vs FBD                    | Cellular Component<br>Biological Processes | integral component of membrane; plasma membrane; cell part<br>cell-cell adhesion                                                                                                                                                                                                                                                                                                                                                                                                                                                                                                                                                                                                                                                                                                                                                                                                                                                                                                                                                                                                                                                                                                                                                                                                                                                                                                                                                                                                                                                                                                                 |
| BICF2G630842219          | 16  | yes; exon           | PKD1L1        | EA vs FBD                    | Cellular Component<br>Biological Processes | integral component of membrane<br>cell-cell adhesion                                                                                                                                                                                                                                                                                                                                                                                                                                                                                                                                                                                                                                                                                                                                                                                                                                                                                                                                                                                                                                                                                                                                                                                                                                                                                                                                                                                                                                                                                                                                             |
| BICF2G630842234          | 16  | yes; intron         | PKD1L1        | EA vs FBD                    | Cellular Component<br>Biological Processes | integral component of membrane<br>cell-cell adhesion                                                                                                                                                                                                                                                                                                                                                                                                                                                                                                                                                                                                                                                                                                                                                                                                                                                                                                                                                                                                                                                                                                                                                                                                                                                                                                                                                                                                                                                                                                                                             |
| TIGRP2P367127_rs 8543245 | 29  | no                  | MMP16         | EA vs FBD                    | Cellular Component<br>Biological Processes | integral component of membrane<br><b>collagen catabolic process</b> ; <b>multicellular organismal protein metabolic process</b> ; <b>multicellular organismal protein catabolic process</b> ; <b>protein digestion</b>                                                                                                                                                                                                                                                                                                                                                                                                                                                                                                                                                                                                                                                                                                                                                                                                                                                                                                                                                                                                                                                                                                                                                                                                                                                                                                                                                                           |
| BICF2S23653049           | 21  | yes; exon           | CALCB         | EA vs FBD                    | Cellular Component<br>Biological Processes | integral component of plasma membrane; extracellular region part<br><b>regulation of neurological system process</b> ; <b>neuropeptide signaling pathway</b> ; <b>behaviour</b> ; <b>feeding behaviour</b> ; <b>multicellular organismal development</b> ; <b>organ development</b> ; <b>anatomical structure morphogenesis</b> ; <b>skeletal system development</b> ; <b>regulation of ossification</b> ; <b>biomineral tissue development</b> ; <b>positive regulation of bone remodeling</b> ; vasodilation of artery involved in baroreceptor response to increased systemic arterial blood pressure; regulation of smooth muscle contraction; regulation of heart rate; regulation of systemic arterial blood pressure by baroreceptor feedback; baroreceptor response to increased vasodilation of artery; baroreceptor response to increased systemic arterial blood pressure; vascular process in circulatory system; tube morphogenesis; inflammatory response; cAMP-mediated signaling; positive regulation of hydrolase activity; positive regulation of lyase activity; positive regulation of adenylate cyclase activity; activation of phospholipase C activity; regulation of blood vessel size; vasodilation; positive regulation of cytosolic calcium ion concentration; homeostatic process; cell-cell signaling; response to external stimulus; response to heat; detection of temperature stimulus involved in sensory perception of pain; response to pain; multicellular organismal response to stress; regulation of biological quality; regulation of biological process |
|                          |     |                     |               |                              | Molecular Function                         | <b>dopamine neurotransmitter receptor activity</b> ; <b>hormone activity</b> ; calcitonin receptor binding; G-protein coupled receptor signaling pathway; negative regulation of transcription                                                                                                                                                                                                                                                                                                                                                                                                                                                                                                                                                                                                                                                                                                                                                                                                                                                                                                                                                                                                                                                                                                                                                                                                                                                                                                                                                                                                   |
|                          |     |                     |               |                              | Cellular Component                         | <b>axon part</b> ; <b>neuronal cell body</b> ; <b>neuron projection</b> ; <b>terminal bouton</b> ; endoplasmic                                                                                                                                                                                                                                                                                                                                                                                                                                                                                                                                                                                                                                                                                                                                                                                                                                                                                                                                                                                                                                                                                                                                                                                                                                                                                                                                                                                                                                                                                   |

|                             |    |                |                                                      |           |                      |                                                                                                                                                                                                                                                                                                                                                                                                                             |
|-----------------------------|----|----------------|------------------------------------------------------|-----------|----------------------|-----------------------------------------------------------------------------------------------------------------------------------------------------------------------------------------------------------------------------------------------------------------------------------------------------------------------------------------------------------------------------------------------------------------------------|
| TIGRP2P97765_rs8<br>917688  | 7  | no             | SETBP1                                               | EA vs FBD | Molecular Function   | reticulum; extracellular space; nucleus; cell projection; soluble fraction                                                                                                                                                                                                                                                                                                                                                  |
| BICF2P1103910               | 3  | no             | ADRA2C                                               | no        | Cellular Component   | DNA binding; protein binding<br>cell part; nucleus                                                                                                                                                                                                                                                                                                                                                                          |
| BICF2S23056947              | 11 | no             | CYLC2                                                | no        | Biological Processes | <b>behaviour</b><br><b>alpha2-adrenergic receptor activity</b>                                                                                                                                                                                                                                                                                                                                                              |
| TIGRP2P326458_rs<br>9245895 | 25 | no             | DNMT3A                                               | no        | Cellular Component   | integral component of membrane; plasma membrane                                                                                                                                                                                                                                                                                                                                                                             |
| TIGRP2P197019_rs<br>8772369 | 15 | yes            | OR1B1<br>(human)<br>homolog                          | no        | Biological Processes | <b>multicellular organismal development; spermatogenesis;</b> cell differentiation                                                                                                                                                                                                                                                                                                                                          |
| BICF2P40264                 | 31 | yes            | SH3BGR<br>homolog                                    | no        | Cellular Component   | cell part; structural constituent of cytoskeleton; cytoplasm                                                                                                                                                                                                                                                                                                                                                                |
| BICF2S22912847              | 10 | no             | HNRNPA1<br>homolog<br>uncharac-<br>terised in<br>dog | no        | Biological Processes | <b>methytransferase activity</b>                                                                                                                                                                                                                                                                                                                                                                                            |
| BICF2S2298493               | 19 | no             | INHBB                                                | no        | Molecular Function   | <b>sensory perception of smell; response to stimulus; signal transduction;</b> G-protein<br>coupled receptor protein signaling pathway                                                                                                                                                                                                                                                                                      |
| BICF2P886804;<br>rs8850580  | 24 | yes;<br>intron | POFUT1                                               | no        | Cellular Component   | <b>olfactory receptor activity</b><br>integral component of membrane; plasma membrane                                                                                                                                                                                                                                                                                                                                       |
| BICF2P262082                | 19 | no             | PCDH18                                               | no        | Cellular Component   | signal transducer activity; protein complex assembly; SH3/SH2 adaptor activity                                                                                                                                                                                                                                                                                                                                              |
| BICF2P433473                | 19 | no             | PCDH18                                               | no        | Cellular Component   | cell part; cytoplasm                                                                                                                                                                                                                                                                                                                                                                                                        |
| BICF2S23651627              | 10 | no             | LLPH                                                 | no        | Molecular Function   | nucleotide binding; nuclear mRNA splicing; single-stranded DNA binding; RNA binding;<br>RNA splicing; protein binding; RNA export from nucleus; mRNA transport, nuclear<br>import                                                                                                                                                                                                                                           |
| BICF2P1396496               | 1  | no             | MC2R                                                 | no        | Molecular Function   | cell part; nucleus; nucleoplasm; spliceosome; cytoplasm; heterogeneous nuclear<br>ribonucleoprotein complex                                                                                                                                                                                                                                                                                                                 |
|                             |    |                |                                                      |           | Biological Process   | <b>hormone activity; regulation of gonadotropin secretion; regulation of follicle-<br/>stimulating hormone secretion; multicellular organismal development; ovarian<br/>follicle development; growth factor activity; negative regulation of hepatocyte<br/>growth factor biosynthetic process; growth;</b> cytokine activity; defense response; cell<br>differentiation; response to external stimulus; system development |
|                             |    |                |                                                      |           | Cellular Component   | host cell surface receptor binding; protein homodimerization activity<br>extracellular region                                                                                                                                                                                                                                                                                                                               |
|                             |    |                |                                                      |           | Biological Process   | <b>multicellular organismal development; embryonic development; carbohydrate<br/>metabolic process; monosaccharide metabolic process; hexose metabolic<br/>process; fucose metabolic process</b>                                                                                                                                                                                                                            |
|                             |    |                |                                                      |           | Molecular Function   | cell surface receptor linked signal transduction; notch signalling pathway; peptide-O-<br>fucosyltransferase activity; O-glycan processing; transferase activity; manganese ion<br>binding; regulation of transcription;                                                                                                                                                                                                    |
|                             |    |                |                                                      |           | Cellular Component   | integral to Golgi membrane; cell part; endoplasmic reticulum                                                                                                                                                                                                                                                                                                                                                                |
|                             |    |                |                                                      |           | -                    | -                                                                                                                                                                                                                                                                                                                                                                                                                           |
|                             |    |                |                                                      |           | -                    | -                                                                                                                                                                                                                                                                                                                                                                                                                           |
|                             |    |                |                                                      |           | -                    | -                                                                                                                                                                                                                                                                                                                                                                                                                           |
|                             |    |                |                                                      |           | Molecular Function   | <b>adrenocorticotropin receptor activity;</b> rhodopsin-like receptor activity;<br>transmembrane receptor activity; G-protein coupled receptor protein signaling pathway;<br>G-protein signaling, coupled to cyclic nucleotide second messenger; cell-surface<br>receptor linked signal transduction                                                                                                                        |
|                             |    |                |                                                      |           | Cellular Component   | cell part; integral to plasma membrane                                                                                                                                                                                                                                                                                                                                                                                      |

## C

| SNP ID                         | chr | located within gene | Gene symbol              | Outlier in other comparisons | GO categories                                                        | GO terms                                                                                                                                                                                                                                                                                                                                                                                                                                                                                                                                                                                                                                                                                                                                                                                                                                            |
|--------------------------------|-----|---------------------|--------------------------|------------------------------|----------------------------------------------------------------------|-----------------------------------------------------------------------------------------------------------------------------------------------------------------------------------------------------------------------------------------------------------------------------------------------------------------------------------------------------------------------------------------------------------------------------------------------------------------------------------------------------------------------------------------------------------------------------------------------------------------------------------------------------------------------------------------------------------------------------------------------------------------------------------------------------------------------------------------------------|
| BICF2G630133149;<br>rs23978953 | 37  | yes;<br>intron      | EPHA4                    | MB vs FBD                    | Molecular Function<br><br>Cellular Component                         | nucleotide binding; ATP binding; protein amino acid phosphorylation; transferase activity; transmembrane receptor activity; transmembrane receptor protein tyrosine kinase signaling pathway; cell surface receptor linked signal transduction; ephrin receptor activity<br>cell part; extracellular region; integral component of membrane; plasma membrane                                                                                                                                                                                                                                                                                                                                                                                                                                                                                        |
| BICF2P1348247;<br>rs8579426    | 18  | yes;<br>intron      | ATXN7L1                  | EA vs FBD                    | -                                                                    | -                                                                                                                                                                                                                                                                                                                                                                                                                                                                                                                                                                                                                                                                                                                                                                                                                                                   |
| BICF2G630560144;<br>rs24457899 | 7   | yes;<br>intron      | NOL4                     | EA vs FBD                    | Biological Processes<br>Cellular Component                           | RNA binding<br>nucleus; nucleolus                                                                                                                                                                                                                                                                                                                                                                                                                                                                                                                                                                                                                                                                                                                                                                                                                   |
| BICF2G630662694                | 13  | no                  | GAPDHS<br>homo-<br>logue | EA vs FBD                    | Biological Processes<br><br>Molecular Function                       | <b>sperm motility; negative regulation of flagellar cell motility; positive regulation of carbohydrate metabolic process; regulation of catabolic process; positive regulation of glycolytic process</b><br>glyceraldehyde-3-phosphate dehydrogenase (NAD+) (phosphorylating) activity; oxidoreductase activity; NAD binding                                                                                                                                                                                                                                                                                                                                                                                                                                                                                                                        |
| BICF2G630509420;<br>rs23187455 | 24  | yes;<br>intron      | MKKS                     | EA vs FBD                    | Cellular Component<br>Biological Processes                           | cell projection; flagellum<br><b>behaviour; multi-organism behavior; social behavior; development of primary sexual characteristics; developmental process involved in reproduction; sex differentiation; reproductive structure development; gonad development; spermatid development; spermatid differentiation; anatomical structure morphogenesis; organ development;</b> heart development; nonmotile primary cilium assembly; flagellum assembly; flagellum organization; cell projection assembly; detection of abiotic stimulus; detection of mechanical stimulus involved in sensory perception of sound; photoreceptor cell maintenance; response to mechanical stimulus; response to abiotic stimulus; homeostatic process; cellular homeostasis; regulation of biological quality<br><b>dopamine neurotransmitter receptor activity</b> |
| BICF2S2364842;<br>rs24136831   | 4   | yes;<br>intron      | ERGIC1                   | no                           | Molecular Function<br>Molecular Function                             | protein binding<br>ER-Golgi intermediate compartment membrane; endoplasmic reticulum membrane; ER to Golgi vesicle-mediated transport                                                                                                                                                                                                                                                                                                                                                                                                                                                                                                                                                                                                                                                                                                               |
| BICF2P176847                   | 7   | yes,<br>exon 9      | DTNA                     | no                           | Cellular Component<br>Biological Processes<br><br>Cellular Component | <b>neuromuscular synaptic transmission;</b> calcium ion binding; zinc ion binding; protein binding; striated muscle contraction; signal transduction<br><b>synapse;</b> cell junction; cytoplasm                                                                                                                                                                                                                                                                                                                                                                                                                                                                                                                                                                                                                                                    |
| BICF2G630460099;<br>rs23187455 | 34  | yes;<br>intron      | ATP13A4                  | no                           | Biological Processes<br><br>Cellular Component                       | nucleotide binding; ATP binding; hydrolase activity; cation transport; ATPase activity coupled to transmembrane transport of ions<br>integral to membrane                                                                                                                                                                                                                                                                                                                                                                                                                                                                                                                                                                                                                                                                                           |
