# Supplementary material for: Diversifying Selection Between Pure-Breed and Free-Breeding Dogs Inferred from Genome-Wide SNP Analysis
Source: PubMed Central journal article supplement (PMC4978884; doi:10.1534/g3.116.029678), 2016-05-27
Supplement: supp_g3.116.029678_TableS6.pdf [file supp_g3.116.029678_TableS6.pdf]

**Table S6.** Shared outlier SNPs inferred in two BAYESCAN analyses comparing FBDs with either East Asian or European dog breeds. Eurasian golden jackal *Canis aureus* and black-backed jackal *C. mesomelas* were genotyped for only 3 individuals each. An allele fixed in black-backed jackal is likely an ancestral allele for the wolf/dog lineage. In FBDs and some European breeds, a heterozygous genotype at these SNPs, suggesting segmental duplication with a different allele fixed at each gene copy.

| SNP ID                  | Ch<br>r | SNP<br>position<br>CanFam3.1 | Location<br>relative to<br>closest gene | Gene<br>symbol       | Substitu-<br>tion type | Functional effect of<br>mutation                                            | Genotypes               |                         |      |            |                              |                            |
|-------------------------|---------|------------------------------|-----------------------------------------|----------------------|------------------------|-----------------------------------------------------------------------------|-------------------------|-------------------------|------|------------|------------------------------|----------------------------|
|                         |         |                              |                                         |                      |                        |                                                                             | East<br>Asian<br>breeds | Europe-<br>an<br>breeds | FBDs | Grey wolf  | Eurasian<br>golden<br>jackal | Black-<br>backed<br>jackal |
| BICF2G630842219         | 16      | 193,966                      | exon                                    | <i>PKD1L1</i>        | A/G                    | Synonymous substitution                                                     | AA                      | AA, AG*                 | AG   | AA, AG, GG | AA                           | AA                         |
| BICF2G630842234         | 16      | 196,716                      | intron                                  | <i>PKD1L1</i>        | A/G                    | Nucleotide substitution does not change binding of TF                       | AA                      | AA, AG*                 | AG   | AA, AG, GG | AA, GG                       | GG                         |
| BICF2S23454833          | 16      | 210,603                      | 10,650 3'-downstream                    | <i>PKD1L1</i>        | A/C                    | Nucleotide substitution changes the type of TFs bound                       | AA                      | AA, AC*                 | AC   | AA, AC, CC | AA                           | AA                         |
| TIGRP2P369635_rs8651736 | 36      | 5,525,355                    | intron                                  | <i>MARCH7</i>        | G/T                    | No putative TF binding sites were identified for both alleles               | TT                      | TT                      | GT   | TT, GT     | GG                           | GG                         |
| BICF2S23653049          | 21      | 37,658,358                   | exon (5'UTR)                            | <i>CALCB (CRSP1)</i> | C/T                    | Possible effect on the regulation of translation                            | TT                      | TT, CT*                 | CT   | TT         | TT                           | TT                         |
| BICF2P1363919           | 31      | 39,884,152                   | -652 3'-downstream                      | <i>V1R</i> homologue | A/G                    | Nucleotide substitution changes the type of TFs bound                       | GG                      | GG, AG, AA              | AG   | GG, AG     | AA, GG                       | AA                         |
| TIGRP2P367127_rs8543245 | 29      | 33,726,769                   | -191,715 5'-upstream                    | <i>MMP16</i>         | A/G                    | Nucleotide substitution changes the site from TF-binding (A) to non-binding | GG                      | GG, AG*                 | AG   | GG, AG     | AA, GG                       | GG                         |
| TIGRP2P97765_rs8917688  | 7       | 46,745,071                   | 365,573 3'-downstream                   | <i>SETBP1</i>        | A/G                    | Nucleotide substitution does not change binding of TF                       | GG                      | GG, AG*                 | AG   | GG         | GG, AG                       | failed                     |

\*In each European breed, either homozygous or heterozygous genotype at this SNP occurs in all individuals.
