# Supplementary material for: Diversifying Selection Between Pure-Breed and Free-Breeding Dogs Inferred from Genome-Wide SNP Analysis
Source: PubMed Central journal article supplement (PMC4978884; doi:10.1534/g3.116.029678), 2016-05-27
Supplement: supp_g3.116.029678_TableS7.pdf [file supp_g3.116.029678_TableS7.pdf]

**Table S7.** Shared outlier SNPs inferred in two BAYESCAN analyses comparing East Asian breeds with either FBDs or European breeds. Eurasian golden jackal *Canis aureus* and black-backed jackal *C. mesomelas* were genotyped for only 3 individuals each. An allele fixed in both golden jackal and black-backed jackal is likely an ancestral allele for the wolf/dog lineage.

| SNP ID                         | Chr | SNP position<br>CanFam3.1 | Location relative to<br>closest gene | Gene symbol              | Substitution type | Functional effect of mutation                                               | Frequency of ancestral allele |                 |      |           | Fixed allele           |                     |
|--------------------------------|-----|---------------------------|--------------------------------------|--------------------------|-------------------|-----------------------------------------------------------------------------|-------------------------------|-----------------|------|-----------|------------------------|---------------------|
|                                |     |                           |                                      |                          |                   |                                                                             | East Asian breeds             | European breeds | FBDs | Grey wolf | Eurasian golden jackal | Black-backed jackal |
| BICF2G630560144;<br>rs24457899 | 7   | 55,945,622                | intron                               | <i>NOL4</i>              | A/G               | Nucleotide substitution changes the type of TFs bound                       | 0.93                          | 0.08            | 0.17 | 0.72      | G                      | G                   |
| BICF2P1348247;<br>rs8579426    | 18  | 14,783,296                | intron                               | <i>ATXN7L1</i>           | A/C               | Nucleotide substitution changes the type of TF bound                        | 1.00                          | 0.16            | 0.54 | 1.00      | A                      | A                   |
| BICF2G630509420;<br>rs23187455 | 24  | 11,907,423                | intron                               | <i>MKKS/<br/>BBS6</i>    | C/T               | Nucleotide substitution changes the site from TF-binding (C) to non-binding | 1.00                          | 0.42            | 0.43 | 0.94      | T                      | T                   |
| BICF2G630662694                | 13  | 32,140,606                | 257,806<br>3'-down-stream            | <i>GAPDHS</i><br>homolog | A/G               | Nucleotide substitution changes the type of TF bound                        | 1.00                          | 0.40            | 0.44 | 0.98      | G                      | G                   |
