# Supplementary material for: Diversifying Selection Between Pure-Breed and Free-Breeding Dogs Inferred from Genome-Wide SNP Analysis
Source: PubMed Central journal article supplement (PMC4978884; doi:10.1534/g3.116.029678), 2016-05-27
Supplement: supp_g3.116.029678_TableS8.pdf [file supp_g3.116.029678_TableS8.pdf]

**Table S8** Potential transcription factors binding sites identified using LASAGNA2, assuming a threshold of  $E < 0.001$  (see Methods).

| SNP ID                        | Chr | SNP position<br>CanFam3.1 | Location relative to<br>closest gene | Gene symbol                                              | Gene position<br>(CanFam3.1) | Allele | Transcription Factors (TF)                                |
|-------------------------------|-----|---------------------------|--------------------------------------|----------------------------------------------------------|------------------------------|--------|-----------------------------------------------------------|
| BICF2P1103910                 | 3   | 60,627,895                | -18,237<br>5'-upstream               | <i>ADRA2C</i>                                            | 60,646,132-<br>60,647,722    | C<br>T | Not binding TF<br>HNF-3                                   |
| BICF2G630460099<br>rs23187455 | 34  | 24,997,821                | intron                               | <i>ATP13A4</i>                                           | 24,903,358-<br>25,015,885    | T<br>G | Not binding TF<br>CCAAT box<br>YY1                        |
| BICF2P1348247<br>rs8579426    | 18  | 14,783,296                | intron                               | <i>ATXN7L1</i>                                           | 14,764,456-<br>14,816,374    | A<br>C | C/EBP<br>AP-4                                             |
| BICF2S23653049                | 21  | 37,676,665                | -756<br>5'-upstream                  | <i>CRSP3</i>                                             | 37,676,841-<br>37,680,643    | C<br>T | AP-1<br>COMP-1<br>CAAT                                    |
| BICF2S23056947                | 11  | 59,372,782                | 126,320<br>3'-downstream             | <i>CYLC2</i>                                             | 59,233,061-<br>59,246,462    | A<br>G | NF-1<br>YY1<br>ISRE<br>Pax-2                              |
| TIGRP2P326458<br>rs9245895    | 25  | 19,685,756                | 122,854<br>3'-downstream             | <i>DNMT3A</i>                                            | 19,492,193-<br>19,562,902    | A<br>G | Not binding TF<br>AP2-rep                                 |
| BICF2G630133149<br>rs23978953 | 37  | 27,776,287                | intron                               | <i>EPHA4</i>                                             | 27,677,566-<br>27,809,643    | A<br>G | Not binding TF<br>YY1                                     |
| BICF2S2364842<br>rs24136831   | 4   | 39,487,456                | intron                               | <i>ERGIC1</i>                                            | 39,436,405-<br>39,540,037    | C<br>T | c-Myb<br>PPARalpha<br>RORalpha2<br>AP-1<br>NF-2E<br>XFD-3 |
| BICF2G630662694               | 13  | 32,140,606                | 257,806 3'-<br>downstream            | <i>GAPDHS</i><br>homolog                                 | 31,881,600-<br>31,882,800    | A<br>G | GATA-X<br>HNF-4                                           |
| BICF2S22912847                | 10  | 9,289,666                 | 23,049<br>3'-downstream              | <i>HNRNPA1</i><br>homolog<br>uncharac-<br>terised in dog | 9,265,652-<br>9,266,617      | C<br>T | FOXJ2<br>AP-4<br>MyoD<br>NF-1<br>Tal-1                    |

|                               |    |            |                         |                                    |                           |     |                                                          |
|-------------------------------|----|------------|-------------------------|------------------------------------|---------------------------|-----|----------------------------------------------------------|
| BICF2S2298493                 | 19 | 29,638,300 | -129,385<br>5'-upstream | <i>INHBB</i>                       | 29,767,685-<br>29,768,479 | A   | AP-4<br>Gfi-1                                            |
|                               |    |            |                         |                                    |                           | T   | C/EBP<br>Gfi-1<br>XFD-1                                  |
| BICF2S23651627                | 10 | 8,629,969  | -353<br>5'-upstream     | <i>LLPH</i>                        | 8,630,322-<br>8,638,520   | G   | CdxA                                                     |
|                               |    |            |                         |                                    |                           | T   | COMP-1<br>HNF-4<br>NRSF<br>PPARG                         |
| BICF2P1396496                 | 1  | 24,322,562 | -65,718<br>5'-upstream  | <i>MC2R</i>                        | 24,388,280-<br>24,389,164 | T/C | Nucleotide substitution does not<br>change binding of TF |
| BICF2G630509420<br>rs23187455 | 24 | 11,907,423 | intron                  | <i>MKKS</i>                        | 11,900,097-<br>11,913,740 | C   | NF-1                                                     |
|                               |    |            |                         |                                    |                           | T   | Not binding TF                                           |
| TIGRP2P367127<br>rs8543245    | 29 | 33,726,769 | -191,715<br>5'-upstream | <i>MMP16</i>                       | 33,918,484-<br>34,207,979 | A   | GATA1<br>Lmo2 complex                                    |
|                               |    |            |                         |                                    |                           | G   | Not binding TF                                           |
| BICF2G630560144<br>rs24457899 | 7  | 55,945,622 | intron                  | <i>NOL4</i>                        | 55,618,488-<br>56,009,178 | A   | AP-1<br>HNF-1                                            |
|                               |    |            |                         |                                    |                           | G   | GCNF                                                     |
| TIGRP2P197019<br>rs8772369    | 15 | 17,371,288 | gene                    | <i>OR1B1</i><br>(human)<br>homolog | -                         | C/T | Nucleotide substitution does not<br>change binding of TF |
| BICF2S23454833                | 16 | 210,603    | 10,650<br>3'-downstream | <i>PKD1L1</i>                      | 123,726-199,953           | A   | GC box                                                   |
|                               |    |            |                         |                                    |                           | C   | Ik-3                                                     |
| BICF2G630842234               | 16 | 196,716    | intron                  | <i>PKD1L1</i>                      | 123,726-199,953           | A/G | Nucleotide substitution does not<br>change binding of TF |
| BICF2S2298493                 | 19 | 5,405,052  | -437,119<br>5'-upstream | <i>PCDH18</i>                      | 4,967,933-<br>4,983,273   | A   | FOXD3<br>HFH-1<br>HNF-3<br>TCF11:MafG<br>XFD-3           |
|                               |    |            |                         |                                    |                           | G   | FOXD3<br>HNF-3<br>TCF11:MafG<br>XFD-3                    |
| BICF2P433473                  | 19 | 5,365,804  | -397,871<br>5'-upstream | <i>PCDH18</i>                      | 4,967,933-<br>4,983,273   | A   | ARP-1<br>Brachyury                                       |

|                           |    |            |                          |                          |                           |          |                                                                                                |
|---------------------------|----|------------|--------------------------|--------------------------|---------------------------|----------|------------------------------------------------------------------------------------------------|
| BICF2P886804<br>rs8850580 | 24 | 21,610,316 | intron                   | <i>POFUT1</i>            | 21,608,905-<br>21,636,579 | C<br>A/G | CRE_BP1<br>ER<br>RORalpha1<br>NRSF<br>Nucleotide substitution does not<br>change binding of TF |
| TIGRP2P97765<br>rs8917688 | 7  | 46,745,071 | 365,573<br>3'-downstream | <i>SETBP1</i>            | 45,951,185-<br>46,379,498 | A/G      | Nucleotide substitution does not<br>change binding of TF                                       |
| BICF2P40264               | 31 | no mapping | gene                     | <i>SH3BGR</i><br>homolog | -                         | A/G      | Nucleotide substitution does not<br>change binding of TF                                       |
| BICF2P1363919             | 31 | 39,884,152 | 652<br>3'-downstream     | <i>V1R</i> homolog       | 39,882,640-<br>39,883,500 | A<br>G   | AP-2<br>C/EBP<br>HNF-4                                                                         |

---
